# Supplementary material for: The Prebiotic Activity of a Novel Polysaccharide Extracted from Huangshui by Fecal Fermentation In Vitro
Source: MDPI journal article supplement (doi:10.3390/foods12244406), 2023-12-07
Supplement: s1 [file s1]

# The prebiotic activity of a novel polysaccharide extracted from *Huangshui* by fecal fermentation *in vitro*

Mei Li<sup>1</sup>, Jian Su<sup>2</sup>, Jihong Wu<sup>1\*</sup>, Dong Zhao<sup>2</sup>, Mingquan Huang<sup>1</sup>, Yanping Lu<sup>2</sup>, Jia Zheng<sup>2</sup>, and Hehe Li<sup>1</sup>

<sup>1</sup> Key Laboratory of Brewing Molecular Engineering of China Light Industry, Beijing Technology and Business University, Beijing 100048, China

<sup>2</sup> Key Laboratory of Solid-state Fermentation and Resource Utilization of Sichuan Province/Key Laboratory of Strong Flavor Baijiu Solid-state Fermentation of China Light Industry/Engineering Technology Research Center of Baijiu Brewing Special Grain of China, Wuliangye Yibin Co. Ltd., Yibin 644007, China

\* Correspondence: wujihong12@126.com; Tel.: +86-156-5271-2036

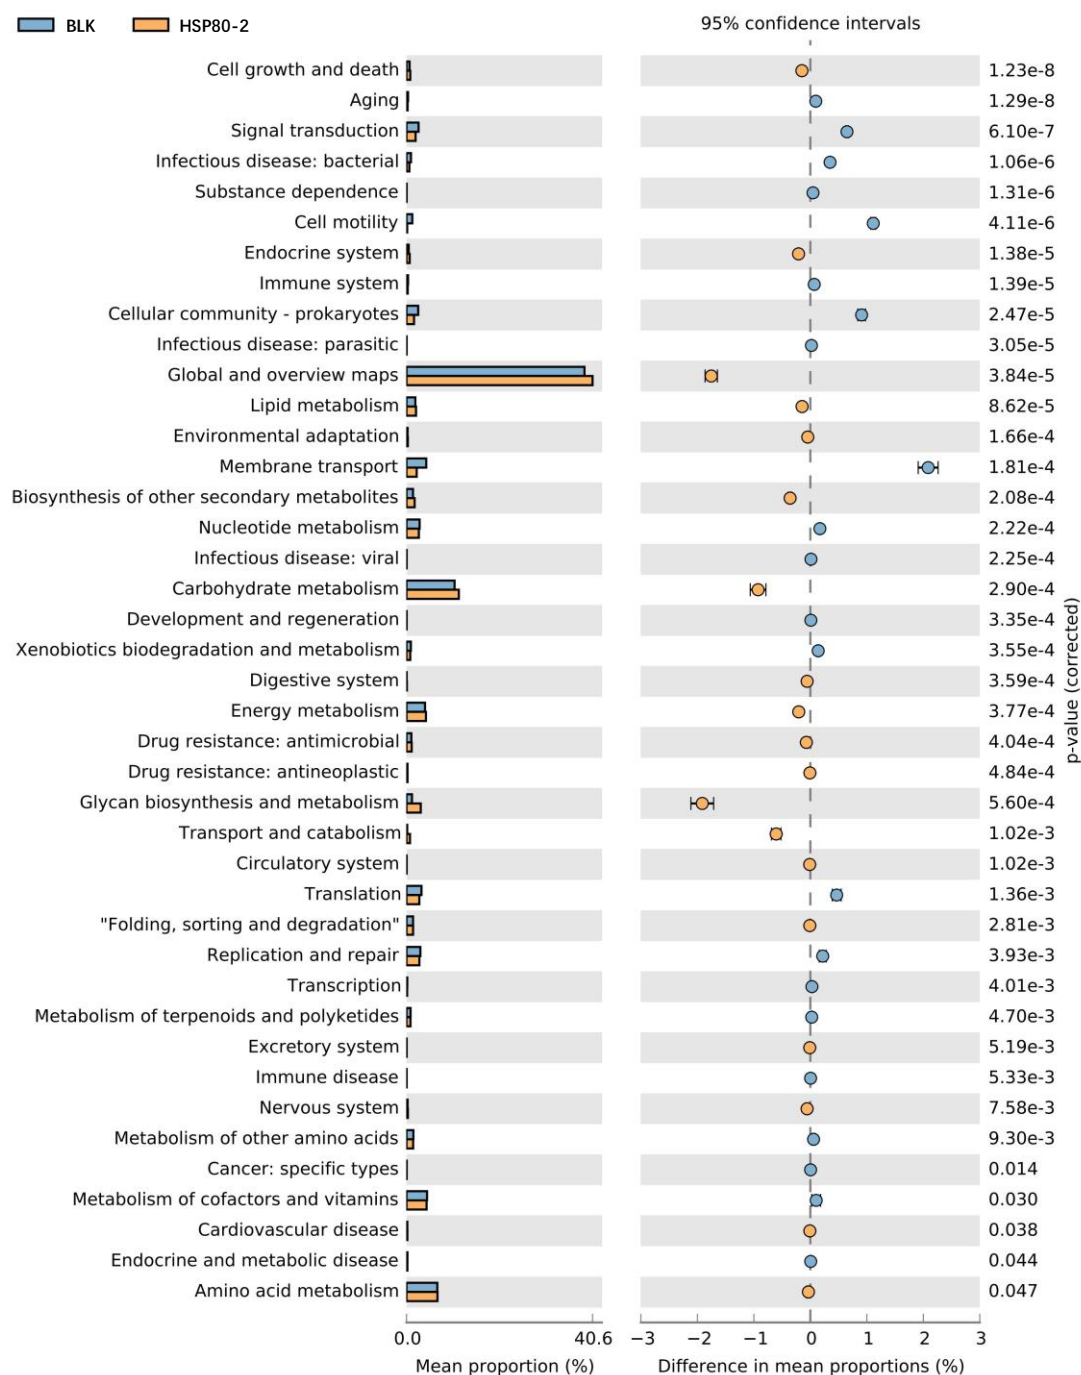

**Figure S1 41** significantly different KEEG pathways on level 2

| KEGG Pathway                                        | KEGG ID | KEGG Pathway                                        | KEGG ID |
|-----------------------------------------------------|---------|-----------------------------------------------------|---------|
| 00010 Glycolysis / Gluconeogenesis                  | 00010   | 00020 Citric Acid Cycle                             | 00020   |
| 00020 Citric Acid Cycle                             | 00020   | 00030 Pyruvate Metabolism                           | 00030   |
| 00030 Pyruvate Metabolism                           | 00030   | 00040 Amino Acid Metabolism                         | 00040   |
| 00040 Amino Acid Metabolism                         | 00040   | 00050 Nucleotide Metabolism                         | 00050   |
| 00050 Nucleotide Metabolism                         | 00050   | 00060 Lipid Metabolism                              | 00060   |
| 00060 Lipid Metabolism                              | 00060   | 00070 Carbohydrate Metabolism                       | 00070   |
| 00070 Carbohydrate Metabolism                       | 00070   | 00080 Vitamin and Cofactor Metabolism               | 00080   |
| 00080 Vitamin and Cofactor Metabolism               | 00080   | 00090 Energy Metabolism                             | 00090   |
| 00090 Energy Metabolism                             | 00090   | 00100 Immune System                                 | 00100   |
| 00100 Immune System                                 | 00100   | 00110 Signaling                                     | 00110   |
| 00110 Signaling                                     | 00110   | 00120 Environmental Information Processing          | 00120   |
| 00120 Environmental Information Processing          | 00120   | 00130 Human Diseases                                | 00130   |
| 00130 Human Diseases                                | 00130   | 00140 Microbial Metabolism                          | 00140   |
| 00140 Microbial Metabolism                          | 00140   | 00150 Metabolism of Other Organisms                 | 00150   |
| 00150 Metabolism of Other Organisms                 | 00150   | 00160 Biotin Metabolism                             | 00160   |
| 00160 Biotin Metabolism                             | 00160   | 00170 Steroid Metabolism                            | 00170   |
| 00170 Steroid Metabolism                            | 00170   | 00180 Xenobiotics Biodegradation and Bioremediation | 00180   |
| 00180 Xenobiotics Biodegradation and Bioremediation | 00180   | 00190 Environmental Biodegradation                  | 00190   |
| 00190 Environmental Biodegradation                  | 00190   | 00200 Microbial Metabolism                          | 00200   |
| 00200 Microbial Metabolism                          | 00200   | 00210 Metabolism of Other Organisms                 | 00210   |
| 00210 Metabolism of Other Organisms                 | 00210   | 00220 Biotin Metabolism                             | 00220   |
| 00220 Biotin Metabolism                             | 00220   | 00230 Steroid Metabolism                            | 00230   |
| 00230 Steroid Metabolism                            | 00230   | 00240 Xenobiotics Biodegradation and Bioremediation | 00240   |
| 00240 Xenobiotics Biodegradation and Bioremediation | 00240   | 00250 Environmental Biodegradation                  | 00250   |
| 00250 Environmental Biodegradation                  | 00250   | 00260 Microbial Metabolism                          | 00260   |
| 00260 Microbial Metabolism                          | 00260   | 00270 Metabolism of Other Organisms                 | 00270   |
| 00270 Metabolism of Other Organisms                 | 00270   | 00280 Biotin Metabolism                             | 00280   |
| 00280 Biotin Metabolism                             | 00280   | 00290 Steroid Metabolism                            | 00290   |
| 00290 Steroid Metabolism                            | 00290   | 00300 Xenobiotics Biodegradation and Bioremediation | 00300   |
| 00300 Xenobiotics Biodegradation and Bioremediation | 00300   | 00310 Environmental Biodegradation                  | 00310   |
| 00310 Environmental Biodegradation                  | 00310   | 00320 Microbial Metabolism                          | 00320   |
| 00320 Microbial Metabolism                          | 00320   | 00330 Metabolism of Other Organisms                 | 00330   |
| 00330 Metabolism of Other Organisms                 | 00330   | 00340 Biotin Metabolism                             | 00340   |
| 00340 Biotin Metabolism                             | 00340   | 00350 Steroid Metabolism                            | 00350   |
| 00350 Steroid Metabolism                            | 00350   | 00360 Xenobiotics Biodegradation and Bioremediation | 00360   |
| 00360 Xenobiotics Biodegradation and Bioremediation | 00360   | 00370 Environmental Biodegradation                  | 00370   |
| 00370 Environmental Biodegradation                  | 00370   | 00380 Microbial Metabolism                          | 00380   |
| 00380 Microbial Metabolism                          | 00380   | 00390 Metabolism of Other Organisms                 | 00390   |
| 00390 Metabolism of Other Organisms                 | 00390   | 00400 Biotin Metabolism                             | 00400   |
| 00400 Biotin Metabolism                             | 00400   | 00410 Steroid Metabolism                            | 00410   |
| 00410 Steroid Metabolism                            | 00410   | 00420 Xenobiotics Biodegradation and Bioremediation | 00420   |
| 00420 Xenobiotics Biodegradation and Bioremediation | 00420   | 00430 Environmental Biodegradation                  | 00430   |
| 00430 Environmental Biodegradation                  | 00430   | 00440 Microbial Metabolism                          | 00440   |
| 00440 Microbial Metabolism                          | 00440   | 00450 Metabolism of Other Organisms                 | 00450   |
| 00450 Metabolism of Other Organisms                 | 00450   | 00460 Biotin Metabolism                             | 00460   |
| 00460 Biotin Metabolism                             | 00460   | 00470 Steroid Metabolism                            | 00470   |
| 00470 Steroid Metabolism                            | 00470   | 00480 Xenobiotics Biodegradation and Bioremediation | 00480   |
| 00480 Xenobiotics Biodegradation and Bioremediation | 00480   | 00490 Environmental Biodegradation                  | 00490   |
| 00490 Environmental Biodegradation                  | 00490   | 00500 Microbial Metabolism                          | 00500   |
| 00500 Microbial Metabolism                          | 00500   | 00510 Metabolism of Other Organisms                 | 00510   |
| 00510 Metabolism of Other Organisms                 | 00510   | 00520 Biotin Metabolism                             | 00520   |
| 00520 Biotin Metabolism                             | 00520   | 00530 Steroid Metabolism                            | 00530   |
| 00530 Steroid Metabolism                            | 00530   | 00540 Xenobiotics Biodegradation and Bioremediation | 00540   |
| 00540 Xenobiotics Biodegradation and Bioremediation | 00540   | 00550 Environmental Biodegradation                  | 00550   |
| 00550 Environmental Biodegradation                  | 00550   | 00560 Microbial Metabolism                          | 00560   |
| 00560 Microbial Metabolism                          | 00560   | 00570 Metabolism of Other Organisms                 | 00570   |
| 00570 Metabolism of Other Organisms                 | 00570   | 00580 Biotin Metabolism                             | 00580   |
| 00580 Biotin Metabolism                             | 00580   | 00590 Steroid Metabolism                            | 00590   |
| 00590 Steroid Metabolism                            | 00590   | 00600 Xenobiotics Biodegradation and Bioremediation | 00600   |
| 00600 Xenobiotics Biodegradation and Bioremediation | 00600   | 00610 Environmental Biodegradation                  | 00610   |
| 00610 Environmental Biodegradation                  | 00610   | 00620 Microbial Metabolism                          | 00620   |
| 00620 Microbial Metabolism                          | 00620   | 00630 Metabolism of Other Organisms                 | 00630   |
| 00630 Metabolism of Other Organisms                 | 00630   | 00640 Biotin Metabolism                             | 00640   |
| 00640 Biotin Metabolism                             | 00640   | 00650 Steroid Metabolism                            | 00650   |
| 00650 Steroid Metabolism                            | 00650   | 00660 Xenobiotics Biodegradation and Bioremediation | 00660   |
| 00660 Xenobiotics Biodegradation and Bioremediation | 00660   | 00670 Environmental Biodegradation                  | 00670   |
| 00670 Environmental Biodegradation                  | 00670   | 00680 Microbial Metabolism                          | 00680   |
| 00680 Microbial Metabolism                          | 00680   | 00690 Metabolism of Other Organisms                 | 00690   |
| 00690 Metabolism of Other Organisms                 | 00690   | 00700 Biotin Metabolism                             | 00700   |
| 00700 Biotin Metabolism                             | 00700   | 00710 Steroid Metabolism                            | 00710   |
| 00710 Steroid Metabolism                            | 00710   | 00720 Xenobiotics Biodegradation and Bioremediation | 00720   |
| 00720 Xenobiotics Biodegradation and Bioremediation | 00720   | 00730 Environmental Biodegradation                  | 00730   |
| 00730 Environmental Biodegradation                  | 00730   | 00740 Microbial Metabolism                          | 00740   |
| 00740 Microbial Metabolism                          | 00740   | 00750 Metabolism of Other Organisms                 | 00750   |
| 00750 Metabolism of Other Organisms                 | 00750   | 00760 Biotin Metabolism                             | 00760   |
| 00760 Biotin Metabolism                             | 00760   | 00770 Steroid Metabolism                            | 00770   |
| 00770 Steroid Metabolism                            | 00770   | 00780 Xenobiotics Biodegradation and Bioremediation | 00780   |
| 00780 Xenobiotics Biodegradation and Bioremediation | 00780   | 00790 Environmental Biodegradation                  | 00790   |
| 00790 Environmental Biodegradation                  | 00790   | 00800 Microbial Metabolism                          | 00800   |
| 00800 Microbial Metabolism                          | 00800   | 00810 Metabolism of Other Organisms                 | 00810   |
| 00810 Metabolism of Other Organisms                 | 00810   | 00820 Biotin Metabolism                             | 00820   |
| 00820 Biotin Metabolism                             | 00820   | 00830 Steroid Metabolism                            | 00830   |
| 00830 Steroid Metabolism                            | 00830   | 00840 Xenobiotics Biodegradation and Bioremediation | 00840   |
| 00840 Xenobiotics Biodegradation and Bioremediation | 00840   | 00850 Environmental Biodegradation                  | 00850   |
| 00850 Environmental Biodegradation                  | 00850   | 00860 Microbial Metabolism                          | 00860   |
| 00860 Microbial Metabolism                          | 00860   | 00870 Metabolism of Other Organisms                 | 00870   |
| 00870 Metabolism of Other Organisms                 | 00870   | 00880 Biotin Metabolism                             | 00880   |
| 00880 Biotin Metabolism                             | 00880   | 00890 Steroid Metabolism                            | 00890   |
| 00890 Steroid Metabolism                            | 00890   | 00900 Xenobiotics Biodegradation and Bioremediation | 00900   |
| 00900 Xenobiotics Biodegradation and Bioremediation | 00900   | 00910 Environmental Biodegradation                  | 00910   |
| 00910 Environmental Biodegradation                  | 00910   | 00920 Microbial Metabolism                          | 00920   |
| 00920 Microbial Metabolism                          | 00920   | 00930 Metabolism of Other Organisms                 | 00930   |
| 00930 Metabolism of Other Organisms                 | 00930   | 00940 Biotin Metabolism                             | 00940   |
| 00940 Biotin Metabolism                             | 00940   | 00950 Steroid Metabolism                            | 00950   |
| 00950 Steroid Metabolism                            | 00950   | 00960 Xenobiotics Biodegradation and Bioremediation | 00960   |
| 00960 Xenobiotics Biodegradation and Bioremediation | 00960   | 00970 Environmental Biodegradation                  | 00970   |
| 00970 Environmental Biodegradation                  | 00970   | 00980 Microbial Metabolism                          | 00980   |
| 00980 Microbial Metabolism                          | 00980   | 00990 Metabolism of Other Organisms                 | 00990   |
| 00990 Metabolism of Other Organisms                 | 00990   | 01000 Biotin Metabolism                             | 01000   |

Figure S2 256 significantly different KEEG pathways on level 3
